# Supplementary material
Source: publisher site journal article supplement (https://www.dovepress.com/article/386440)
Supplement: Supplementary file 1 [file get_supplementary_file.php]

**Table S1 Correlation between exercise induced hypoalgesia with psychosocial variables with multiple imputation for missing TSK values**

|  | MSPSS Significant other | MSPSS Friends | MSPSS Family | MSPSS Total | STAMPS IWS total | TSK (n=38) | PCS Total | DASS Depression | DASS Anxiety | DASS Stress |
| --- | --- | --- | --- | --- | --- | --- | --- | --- | --- | --- |
| EIH PPT Left forearm | -0.368 (0.023)* | -0.267 (0.105) | -0.326 (0.046)* | -0.377 (0.02)* | -0.04 (0.811) | 0.065 (0.697) | 0.106 (0.526) | -0.001 (0.996) | -0.072 (0.668) | -0.137 (0.412) |
| EIH PPT Right forearm | -0.156 (0.35) | -0.182 (0.274) | -0.254 (0.124) | -0.223 (0.179) | 0.181 (0.277) | -0.065 (0.697) | -0.201 (0.226) | 0.099 (0.554) | 0 (0.999) | 0.019 (0.912) |
| EIH PPT Pooled forearm | -0.333 (0.041)* | -0.277 (0.092) | -0.372 (0.021)* | -0.397 (0.014)* | 0.09 (0.589) | 0.026 (0.876) | -0.003 (0.986) | 0.069 (0.682) | -0.034 (0.84) | -0.052 (0.755) |
| EIH PPT Left lumbar | -0.266 (0.107) | -0.363 (0.025)* | -0.279 (0.09) | -0.32 (0.05)* | -0.163 (0.329) | 0.124 (0.458) | -0.184 (0.27) | -0.086 (0.608) | -0.213 (0.2) | -0.045 (0.79) |
| EIH PPT Right lumbar | -0.213 (0.2) | -0.125 (0.455) | -0.087 (0.603) | -0.14 (0.401) | -0.009 (0.958) | -0.081 (0.629) | -0.066 (0.692) | -0.225 (0.174) | -0.123 (0.463) | -0.14 (0.4) |
| EIH PPT Pooled lumbar | -0.28 (0.089) | -0.224 (0.176) | -0.19 (0.253) | -0.242 (0.144) | -0.067 (0.687) | -0.016 (0.926) | -0.202 (0.223) | -0.162 (0.331) | -0.207 (0.211) | -0.138 (0.41) |
| EIH PPT Left calf | -0.196 (0.239) | -0.238 (0.15) | -0.065 (0.698) | -0.15 (0.37) | -0.01 (0.952) | 0.035 (0.836) | -0.074 (0.658) | -0.002 (0.99) | 0.069 (0.681) | 0.039 (0.816) |
| EIH PPT Right calf | -0.078 (0.642) | -0.251 (0.128) | -0.055 (0.743) | -0.151 (0.366) | 0.121 (0.468) | -0.046 (0.782) | -0.209 (0.208) | -0.041 (0.805) | -0.048 (0.774) | 0.106 (0.527) |
| EIH PPT Pooled calf | -0.157 (0.347) | -0.23 (0.165) | -0.055 (0.741) | -0.152 (0.363) | 0.094 (0.573) | -0.019 (0.909) | -0.199 (0.231) | -0.028 (0.868) | -0.02 (0.906) | 0.075 (0.653) |
| EIH PPT Global (pooled sites) | -0.357 (0.028)* | -0.329 (0.044)* | -0.309 (0.059) | -0.38 (0.019)* | 0.022 (0.897) | 0.01 (0.953) | -0.118 (0.48) | -0.079 (0.636) | -0.118 (0.479) | -0.085 (0.612) |

Data presented as: Spearman’s rho (p-value). * highlights p-value less than 0.05.

**Table S2 Correlation between exercise induced hypoalgesia with psychosocial variables**

|  | MSPSS Significant other | MSPSS Friends | MSPSS Family | MSPSS Total | STAMPS IWS total | TSK (n=30) | PCS Total | DASS Depression | DASS Anxiety | DASS Stress |
| --- | --- | --- | --- | --- | --- | --- | --- | --- | --- | --- |
| EIH PPT Left forearm | -0.368 (0.023)* | -0.267 (0.105) | -0.326 (0.046)* | -0.377 (0.02)* | -0.04 (0.811) | 0.055 (0.775) | 0.106 (0.526) | -0.001 (0.996) | -0.072 (0.668) | -0.137 (0.412) |
| EIH PPT Right forearm | -0.156 (0.35) | -0.182 (0.274) | -0.254 (0.124) | -0.223 (0.179) | 0.181 (0.277) | -0.11 (0.563) | -0.201 (0.226) | 0.099 (0.554) | 0 (0.999) | 0.019 (0.912) |
| EIH PPT Pooled forearm | -0.333 (0.041)* | -0.277 (0.092) | -0.372 (0.021)* | -0.397 (0.014)* | 0.09 (0.589) | 0.002 (0.99) | -0.003 (0.986) | 0.069 (0.682) | -0.034 (0.84) | -0.052 (0.755) |
| EIH PPT Left lumbar | -0.266 (0.107) | -0.363 (0.025)* | -0.279 (0.09) | -0.32 (0.05)* | -0.163 (0.329) | 0.153 (0.42) | -0.184 (0.27) | -0.086 (0.608) | -0.213 (0.2) | -0.045 (0.79) |
| EIH PPT Right lumbar | -0.213 (0.2) | -0.125 (0.455) | -0.087 (0.603) | -0.14 (0.401) | -0.009 (0.958) | -0.122 (0.521) | -0.066 (0.692) | -0.225 (0.174) | -0.123 (0.463) | -0.14 (0.4) |
| EIH PPT Pooled lumbar | -0.28 (0.089) | -0.224 (0.176) | -0.19 (0.253) | -0.242 (0.144) | -0.067 (0.687) | -0.015 (0.936) | -0.202 (0.223) | -0.162 (0.331) | -0.207 (0.211) | -0.138 (0.41) |
| EIH PPT Left calf | -0.196 (0.239) | -0.238 (0.15) | -0.065 (0.698) | -0.15 (0.37) | -0.01 (0.952) | 0.059 (0.759) | -0.074 (0.658) | -0.002 (0.99) | 0.069 (0.681) | 0.039 (0.816) |
| EIH PPT Right calf | -0.078 (0.642) | -0.251 (0.128) | -0.055 (0.743) | -0.151 (0.366) | 0.121 (0.468) | -0.049 (0.797) | -0.209 (0.208) | -0.041 (0.805) | -0.048 (0.774) | 0.106 (0.527) |
| EIH PPT Pooled calf | -0.157 (0.347) | -0.23 (0.165) | -0.055 (0.741) | -0.152 (0.363) | 0.094 (0.573) | -0.031 (0.87) | -0.199 (0.231) | -0.028 (0.868) | -0.02 (0.906) | 0.075 (0.653) |
| EIH PPT Global (pooled sites) | -0.357 (0.028)* | -0.329 (0.044)* | -0.309 (0.059) | -0.38 (0.019)* | 0.022 (0.897) | -0.027 (0.888) | -0.118 (0.48) | -0.079 (0.636) | -0.118 (0.479) | -0.085 (0.612) |

Data presented as: Spearman’s rho (p-value). * highlights p-value less than 0.05.

**Table S3 Multivariate linear regression for psychosocial variables as predictors for each EIH location**

|  | Effect Estimate | 95% CI | P-value |
| --- | --- | --- | --- |
| EIH PPT Pooled forearm |  |  |  |
| (Intercept) | 6.1873 | 76.94, 64.56 | 0.859 |
| MSPSS Total | 2.9694 | 7.17, 1.23 | 0.159 |
| STAMPS IWS total | 0.1354 | 0.21, 0.49 | 0.436 |
| TSK | 0.3416 | 0.45, 1.13 | 0.386 |
| PCS Total | 0.1274 | 0.64, 0.38 | 0.613 |
| DASS Depression | 0.5709 | 0.65, 1.79 | 0.347 |
| DASS Anxiety | 0.1506 | 1.47, 1.17 | 0.817 |
| DASS Stress | 0.4568 | 1.23, 0.32 | 0.239 |
|  |  |  |  |
| EIH PPT Pooled calf |  |  |  |
| (Intercept) | 10.89439 | 92.46, 114.24 | 0.831 |
| MSPSS Total | 4.3004 | 10.44, 1.83 | 0.163 |
| STAMPS IWS total | 0.11436 | 0.4, 0.63 | 0.651 |
| TSK | 0.34335 | 0.81, 1.5 | 0.549 |
| PCS Total | 0.44515 | 1.19, 0.3 | 0.231 |
| DASS Depression | 0.163 | 1.62, 1.94 | 0.853 |
| DASS Anxiety | 0.04935 | 1.88, 1.98 | 0.959 |
| DASS Stress | 0.04714 | 1.18, 1.09 | 0.933 |
|  |  |  |  |
| EIH PPT Pooled lumbar |  |  |  |
| (Intercept) | 50.834633 | 41.86, 143.53 | 0.2716 |
| MSPSS Total | 5.983642 | 11.49, 0.48 | 0.0341* |
| STAMPS IWS total | 0.008128 | 0.47, 0.45 | 0.9714 |
| TSK | 0.100965 | 1.14, 0.94 | 0.844 |
| PCS Total | 0.40202 | 1.07, 0.26 | 0.2276 |
| DASS Depression | 0.622142 | 2.22, 0.98 | 0.4326 |
| DASS Anxiety | 0.14011 | 1.87, 1.59 | 0.8696 |
| DASS Stress | 0.149156 | 0.87, 1.17 | 0.7669 |
|  |  |  |  |
| EIH PPT Global (pooled sites) |  |  |  |
| (Intercept) | 18.5096 | 52.02, 89.04 | 0.5959 |
| MSPSS Total | 4.41764 | 8.6, 0.23 | 0.0393* |
| STAMPS IWS total | 0.08056 | 0.27, 0.43 | 0.641 |
| TSK | 0.19481 | 0.6, 0.99 | 0.6184 |
| PCS Total | 0.32493 | 0.83, 0.18 | 0.2007 |
| DASS Depression | 0.03738 | 1.18, 1.25 | 0.9503 |
| DASS Anxiety | 0.08055 | 1.4, 1.23 | 0.9013 |
| DASS Stress | 0.11834 | 0.89, 0.66 | 0.7573 |
